# Supplementary material
Source: publisher figshare collection journal article supplement (https://sage.figshare.com/ndownloader/files/15289949)
Supplement: Supplementary file 1 [file 15289949]

## **Appendix A: IT-skills test**

Some items are inspired by online IT-skills tests, others were formulated with the help of the Dutch High Tech Crime Team of the National Police. After data collection ended the High Tech Crime Team also helped evaluating the given answers, which resulted in accepting some extra answers as being correct.

### Explanation provided for respondents:

The next questions are about your knowledge on computers, ICT-systems and the internet. It does not matter if you do not know the answer to a question, we are interested in your knowledge and therefore we ask you to answer **without the help of others** and **without looking up the answers**. If you do not know the answer, you can check the “I do not know” box.

### Question 1:

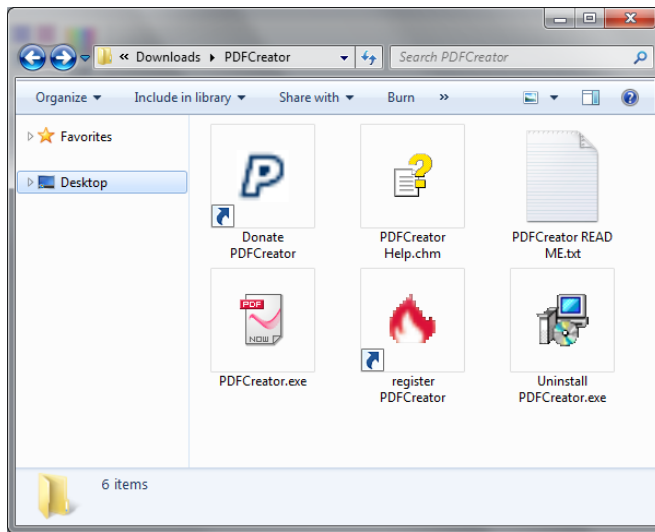

You downloaded the program PDFCreator and you want to use it right away.

You should double click on one of the icons above, which one?

- 1: PDFCreator Help.chm
- 2: PDFCreator READ ME.txt
- 3: PDFCreator.exe
- 4: Uninstall PDFCreator.exe
- 98: I do not know

Correct answer: 3 (83.24%)

Question 2:

What encoding is most likely used in the string below and what does it say without encoding?

“YmFzZTY0IG5hdHV1cmxpamshCg==”

1: The encoding used is: base64

Without encoding is says: "base64 natuurlijk!"

2: The encoding used is: uuencoding

Without encoding is says: "uuencoding is gaaf"

3: The encoding used is: base64

Without encoding is says: "waarom geen base64?"

4: The encoding used is: yenc

Without encoding is says: "wordt usenet nog gebruikt?"

98: I do not know

Correct answer: 1 (12.43%)

Question 3:

The picture below shows an office network:

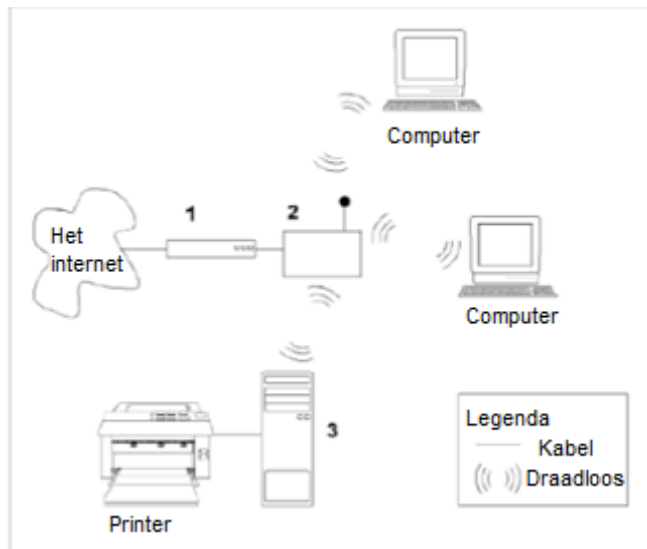

Which of the following descriptions describe the devices most accurately?

- 1: Device 1 is a Broadband modem; Device 2 is a Wireless router; Device 3 is a Wireless printer server
- 2: Device 1 is a Wireless router; Device 2 is a Broadband modem; Device 3 is a network fileserver
- 3: Device 1 is a Network fileserver; Device 2 is a Hub; Device 3 is a Wireless printer server
- 4: Device 1 is a Broadband modem; Device 2 is a Wireless print server; Device 3 is a Wireless router
- 98: I do not know

Correct answer: 1 (67.34%)

Question 4:

In MySQL, where is de metadata saved?

- 1: In the MySQL database “mysql”
- 2: In the MySQL database “metadata”
- 3: In the MySQL database “metasql”
- 4: None of the answers above is correct
- 98: I do not know

Correct answer: 1 or 4 (19.65%)

Question 5:

Which of the following email addresses can be valid?

- 1: [www.infobedrijf.nl](http://www.infobedrijf.nl)
- 2: [info@bedrijf.nl](mailto:info@bedrijf.nl)
- 3: <https://www.infobedrijf.nl>
- 4: [info@bedrijf](mailto:info@bedrijf)
- 98: I do not know

Correct answer: 2 or 4 (92.49%)

Question 6:

Below are statements, which of these statements is/are correct?

*Statement 1: Virtual Machines are used for making the best use of available hardware*

*Statement 2: Virtual Machines are an easy way to separate different users*

*Statement 3: In a Virtual Machine you are protected against malware*

1: statement 1 is correct

2: statement 2 is correct

3: statement 1 and 2 are correct

4: statement 2 and 3 are correct

98: I do not know

Correct answer: 1 or 3 (36.42%)

### Question 7:

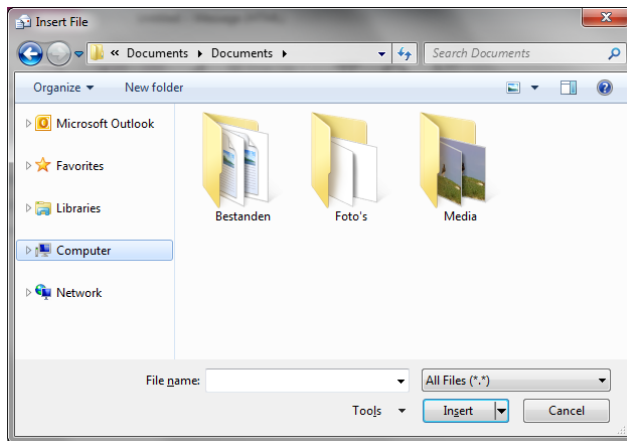

Imagine you want to attach the folders above to an e-mail.

What is the best way to do this?

- 1: Select all three folders and click on insert
- 2: Zip all folders to a “.zip” folder, select that folder and click on insert
- 3: Click on “All Files” and select the file type “folder”, select all folders and click on insert
- 4: Open all folders, select all files in the folders and click on insert
- 98: I do not know

Correct answer: 2 (49.13%)

Question 8:

Which of the following websites uses encryption?

- 1:     www.webshop.nl/secure
- 2:     http://www.webshop.nl/secure
- 3:     https://www.webshop.nl/secure
- 4:     httpv://www.webshop.nl/secure
- 98:    I do not know

Correct answer: 3 (54.34%)

Question 9:

In what order are webpages loaded?

- 1:     URL=>IP=>DNS
- 2:     IP=>DNS=>URL
- 3:     URL=>DNS=>IP
- 4:     IP=>URL=>DNS
- 98:    I do not know

Correct answer: 3 (28.03%)



Question 10:

In the code below it is possible to execute your own code.

```
#include <stdio.h>
#include <string.h>

int test_creds(char* buff)
{
    printf("\n Enter the password : \n");
    gets(buff);
    return !strcmp(buff, "G,tbPZgMkvvW");
}

int main(void)
{
    char buff[15];

    if(test_creds(buff))
    {
        printf ("\n Correct Password \n");
    } else {
        printf ("\n Wrong Password \n");
    }
    return 0;
}
```

Which of the techniques below is not suitable to hinder and/or prevent this kind of misuse?

- 1: PaX
- 2: Taint checking
- 3: SEH
- 4: ASLR
- 98: I do not know

Correct answer: 3 (4.34%)
